# Supplementary material for: Clinical impact of heterogeneously distributed tumor-infiltrating lymphocytes on the prognosis of colorectal cancer
Source: PeerJ journal article supplement (doi:10.7717/peerj.16747), 2024-01-09
Supplement: Patients_data.zip [file Clinical data.xlsx]

## Sheet: Sheet1
No.	Sex	Age (y)	CEA	CA199	Location	Tumor size	Depth of tumor invasion (T stage)	Lymph node invasion (N stage)	Metastasis	TNM stage		Histological type	Histological grade	Chemotherapy	RFS (months)
1	F	59	1	1	Colon	2	T3	1	1	T3N0M0	IIA	Adenocarcinoma	Moderate	NA	39
2	M	78	2	2	Colon	2	T4	2	2	T4N2bM1	IV	Signet ring cell carcinoma	Poorly	NA	36
3	F	74	2	1	Colon	1	T3	1	1	T3N0M0	IIA	Adenocarcinoma	Moderate	NA	70
4	M	46	NA	NA	Colon	1	T4	2	1	T4N1MO	IIIC	Adenocarcinoma	Moderate	1	68
5	F	62	1	1	Colon	2	T4	2	2	T4N2M1	IV	Adenocarcinoma	Moderate-Poorly	NA	51
6	M	70	2	1	Rectum	2	T4	1	1	T4N0M0	IIB	Adenocarcinoma	Moderate	1	65
7	F	46	2	1	Rectum	1	T2	1	1	T2N0M0	I	Adenocarcinoma	Moderate	NA	29
8	M	57	1	1	Rectum	2	T4	1	1	T4N0M0	IIB	Adenocarcinoma	Moderate	1	62
9	M	66	2	1	Colon	2	T4	1	1	T4N0M0	IIB	Mucinous adenocarcinoma	Moderate	1	70
10	M	75	1	1	Rectum	1	T3	2	1	T3N1M0	IIIB	Adenocarcinoma	Moderate	1	15
11	F	46	1	1	Colon	NA	T4	1	1	T4N0M0	IIc	Mucinous adenocarcinoma	Moderate	1	83
12	M	72	1	1	Colon	1	T4	1	2	T4N0M1	IV	Adenocarcinoma	Moderate-Poorly	1	52
13	M	46	1	2	Colon	2	T4	1	1	T4N0M0	IIB	Mucinous adenocarcinoma	Moderate	1	27
14	M	27	2	1	Colon	2	T4	2	1	T4N1M0	IIIB	Signet ring cell carcinoma	Moderate-Poorly	1	54
15	F	79	1	1	Colon	2	T4	2	1	T4N1M0	IIIB	Adenocarcinoma	Moderate	1	22
16	F	76	NA	NA	Colon	2	T4	1	1	T4N0M0	IIB	Adenocarcinoma	Moderate-Poorly	1	28
17	M	63	2	1	Rectum	1	T4	2	1	T4N1M0	IIIB	Adenocarcinoma	Moderate	1	64
18	F	72	1	1	Colon	NA	T4	2	1	T4N1M0	IIIB	Adenocarcinoma	Moderate-Poorly	NA	35
19	M	65	2	1	Rectum	2	T4	1	1	T4N0M0	IIB	Adenocarcinoma	Moderate-Well	1	30
20	M	80	2	1	Colon	1	T1	1	1	T1N0M0	I	Adenocarcinoma	Moderate	NA	36
21	F	36	2	1	Rectum	2	T4	2	1	T4N1M0	IIIB	Adenocarcinoma	Moderate-Poorly	1	54
22	M	86	1	1	Rectum	2	T3	1	1	T3N0M0	IIA	Adenocarcinoma	Moderate	NA	57
23	M	64	1	1	Rectum	1	T2	1	1	T2N0M0	I	Adenocarcinoma	Moderate-Poorly	1	72
24	F	47	1	1	Colon	2	T3	2	1	T3N2M0	IIIB	Mucinous adenocarcinoma	Moderate	1	65
25	M	79	NA	NA	Rectum	1	T3	1	1	T3N0M0	IIA	Mucinous adenocarcinoma	Moderate	NA	31
26	F	43	2	NA	Colon	1	T4	1	1	T4N0M0	IIC	Adenocarcinoma	Moderate	1	45
27	F	75	2	1	Colon	1	T3	2	1	T3N1M0	IIIB	Adenocarcinoma	Moderate	1	45
28	M	56	2	1	Colon	NA	T4	2	1	T4N1M0	IIIB	Adenocarcinoma	Moderate	1	37
29	F	28	2	1	Colon	1	T4	2	1	T4N1M0	IIIB	Mucinous adenocarcinoma	Moderate	1	29
30	F	45	2	2	Colon	2	T4	2	1	T4N2M0	IIIC	Adenocarcinoma	Moderate-Poorly	1	24
31	M	86	1	1	Colon	2	T2	1	2	T2N1M0	III	Adenocarcinoma	Moderate	NA	24
32	M	68	1	1	Colon	1	T4	1	1	T4N0M0	IIB	Adenocarcinoma	Moderate	NA	15
33	F	62	1	1	Colon	1	T4b	2	1	T4bN1M0	IIIC	Adenocarcinoma	Moderate	1	41
34	F	47	1	1	Colon	2	T2	1	1	T2N0M0	I	Adenocarcinoma	Moderate	1	37
35	M	24	2	1	Colon	1	T4	2	2	T4N1M1	IV	Signet ring cell carcinoma	Poorly	NA	24
36	F	57	2	1	Colon	1	T4	2	2	T4N1M1	IV	Adenocarcinoma	Well	1	35
37	F	59	2	1	Rectum	2	T4	2	1	T4N2M0	IIIC	Adenocarcinoma	Moderate	1	20
38	M	50	1	1	Colon	2	T3	2	2	T3N2M1	IV	Adenocarcinoma	Moderate	1	24
39	M	59	2	1	Rectum	2	T4	2	1	T4N1M0	IIIC	Adenocarcinoma	Moderate	NA	9
40	M	79	1	1	Colon	1	T4	2	2	T4N1M1	IV	Mucinous adenocarcinoma	Moderate	1	20
41	F	84	1	1	Colon	1	T4	1	1	T4N0M0	IIB	Adenocarcinoma	Moderate	NA	28
42	M	55	1	1	Colon	1	T4	2	1	T4N1M0	IIIB	Adenocarcinoma	Moderate	1	31
43	F	75	1	1	Colon	1	T4	2	1	T4N1M0	IIIB	Mucinous adenocarcinoma	Moderate	NA	11
44	F	80	1	2	Colon	2	T4	1	1	T4N0M0	IIB	Adenocarcinoma	Moderate-Poorly	NA	42
45	F	47	2	2	Colon	2	T4	2	1	T4N1M0	IIIB	Mucinous adenocarcinoma	Moderate	NA	26
46	M	55	1	1	Colon	1	T4	1	1	T4N0M0	IIB	Adenocarcinoma	Moderate	1	22
47	M	78	1	1	Colon	1	T3	1	1	T3N0M0	IIA	Adenocarcinoma	Moderate	NA	24
48	M	67	1	1	Colon	2	T2	1	1	T2N0M0	I	Adenocarcinoma	Moderate-Well	NA	24
49	F	53	1	1	Colon	2	T4	1	2	T4N0M1	IV	Mucinous adenocarcinoma	Moderate-Poorly	1	23
50	F	65	1	1	Rectum	1	T2	1	1	T2N0M0	I	Adenocarcinoma	Moderate	NA	20
51	F	43	1	2	Rectum	1	T4	2	1	T4N2M0	IIIC	Signet ring cell carcinoma+Mucinous adenocarcinoma	Moderate	1	17
52	M	69	1	1	Colon	1	T4	2	2	T4N1M1	IV	Adenocarcinoma	Moderate	1	22
53	M	29	1	1	Rectum	1	T4	2	2	T4N1M1	IV	Adenocarcinoma	Moderate-Well	1	4
54	M	45	1	1	Colon	1	T4a	2	1	T4aN2bM0	IIIC	Adenocarcinoma	Moderate	1	18
55	M	58	2	1	Rectum	NA	T2	2	2	T2N1M1	IV	Adenocarcinoma	Moderate-Well	NA	16
56	M	72	1	1	Rectum	1	T4	1	1	T4N0M0	IIB	Adenocarcinoma	Moderate	1	8
57	F	32	1	2	Colon	NA	T4	2	2	T4N1M1	IVB	Adenocarcinoma	Poorly -Moderate	NA	16
58	F	43	1	1	Rectum	2	T4	2	1	T4N2M0	IIIC	Adenocarcinoma	Moderate	1	28
59	F	81	1	1	Rectum	1	T4	1	1	T4N0M0	IIB	Adenocarcinoma	Moderate	NA	14
60	F	55	1	1	Rectum	1	T2	2	1	T2N2M0	IIIB	Adenocarcinoma	Moderate	NA	8
61	F	89	2	1	Rectum	1	T4	1	1	T4N0M0	IIB	Adenocarcinoma	Moderate-Well	NA	8
62	M	55	NA	NA	Colon	1	T4	1	1	T4N0M0	IIB	Adenocarcinoma	Moderate-Well	1	26
63	F	49	2	2	Rectum	1	T4	2	1	T4N2bM0	IIIC	Mucinous adenocarcinoma	Moderate	1	4
64	F	64	2	1	Colon	2	T4	2	2	T4N2bM1	IV	Adenocarcinoma	Poorly	NA	6
65	F	92	2	1	Colon	1	T4	1	1	T4N0M0	IIB	Adenocarcinoma	Moderate-Poorly	NA	1
66	M	48	1	1	Rectum	1	T3	1	1	T3N0M0	IIA	Adenocarcinoma	Moderate	1	23
67	M	73	2	1	Colon	1	T4	2	1	T4bN1M0	IIIC	Adenocarcinoma	Moderate-Well	1	20
68	F	61	1	1	Rectum	1	T2	2	1	T2N1M0	IIIA	Adenocarcinoma	Moderate	NA	17
69	M	31	2	1	Colon	2	T4	2	2	T4N1M1	IV	Mucinous adenocarcinoma	Poorly	NA	22
70	F	60	1	1	Colon	NA	T4b	1	1	T4bN0M0	IIC	Mucinous adenocarcinoma	Moderate-Well	1	4
71	F	61	2	1	Colon	1	T3	1	1	T3N0M0	IIA	Adenocarcinoma	Moderate	NA	18
72	M	58	2	1	Colon	1	T3	2	1	T3N1M0	IIIB	Adenocarcinoma	Moderate	1	16
73	F	69	1	1	Colon	1	T2	1	1	T2N0M0	I	Adenocarcinoma	Moderate	NA	8
74	F	77	1	1	Colon	1	T3	1	1	T3N0M0	IIa	Adenocarcinoma	Moderate-Well	1	16
75	M	65	1	1	Rectum	2	T4	2	2	T4N1M1	IV	Adenocarcinoma	Moderate-Poorly	1	53
76	F	86	1	1	Colon	2	T3	1	1	T3N0M0	IIB	Adenocarcinoma	Moderate	NA	51
77	M	61	1	1	Rectum	2	T3	1	1	T3N0M0	IIA	Adenocarcinoma	Moderate	1	65
78	M	68	2	2	Colon	2	T4	2	2	T4N1M1	IV	Mucinous adenocarcinoma	Moderate-Poorly	NA	22
