# Supplementary material for: Clinical impact of heterogeneously distributed tumor-infiltrating lymphocytes on the prognosis of colorectal cancer
Source: PeerJ journal article supplement (doi:10.7717/peerj.16747), 2024-01-09
Supplement: Patients_data.zip [file PFS information for univariate analysis.xlsx]

## Sheet: CD3+TILsTC
PFS	CD3+TILsTC-Low	CD3+TILsTC-High
2	1
46	0
28	0
24	1
53	1
21	1
6	1
34	1
11	1
16	1
45	0
6	1
47	1
4	0
20	1
28	0
8	1
36	0
13	1
28	0
22	1
47	1
35	1
54	1
7	0
24	1
41	1
8	1
48	0
45	1
16	1
43	1
15	0
24	0
68	1
70	0
65	0
39	0
5	1
36		1
54		1
59		1
51		1
42		1
58		1
14		0
49		1
37		1
12		1
10		1
57		0
15		1
42		0
72		0
37		0
48		1
67		0
54		0
70		0
57		0
64		1
47		0
56		0
65		1
47		0
72		0
62		1
65		1
28		1
31		1
29		1
72		0
31		0
34		1
48		1
72		0
23		0
30		0

## Sheet: CD8+TILsTC
PFS	CD8+TILsTC-Low	CD8+TILsTC-High
2	1
6	1
16	1
24	1
15	0
28	0
8	1
34	1
20	1
54	1
53	1
22	1
41	1
28	0
11	1
45	0
45	1
21	1
10	1
35	1
28	0
47	1
24	0
24	1
6	1
46	0
51	1
15	1
36	0
4	0
47	1
29	1
7	0
16	1
67	0
36	1
65	0
13	1
70	0
31		0
54		0
5		1
54		1
49		1
64		1
12		1
43		1
58		1
48		1
68		1
65		1
28		1
59		1
39		0
34		1
62		1
70		0
47		0
31		1
48		0
8		1
72		0
47		0
57		0
37		1
42		0
42		1
72		0
37		0
23		0
65		1
14		0
57		0
30		0
48		1
72		0
56		0
72		0

## Sheet: CD3+TILsIM
PFS	CD3+TILsIM-Low	CD3+TILsIM-High
47	1
6	1
51	1
4	0
2	1
15	1
5	1
11	1
48	1
48	1
12	1
14	0
8	1
46	0
31	0
54	1
35	1
47	0
15	0
10	1
16	1
16	1
65	1
39	0
7	0
58	1
57	0
45	1
29	1
54	0
54	1
36	1
28	0
70	0
8	1
49	1
34	1
24	1
43	1
68		1
47		1
22		1
64		1
65		1
41		1
36		0
13		1
24		1
6		1
28		0
62		1
28		0
48		0
56		0
30		0
67		0
42		1
20		1
31		1
37		0
21		1
23		0
37		1
34		1
70		0
57		0
72		0
24		0
47		0
28		1
59		1
65		0
45		0
53		1
72		0
42		0
72		0
72		0

## Sheet: CD8+TILsIM
PFS	CD8+TILsIM-Low	CD8+TILsIM-High
6	1
2	1
15	1
36	0
10	1
54	1
35	1
47	0
20	1
34	1
31	1
37	0
21	1
47	1
6	1
34	1
15	0
16	1
16	1
39	0
7	0
58	1
51	1
57	0
45	1
29	1
54	1
36	1
28	0
70	0
14	0
8	1
48	0
13	1
56	0
4	0
5	1
30	0
54	0
65		1
67		0
42		1
64		1
37		1
65		1
41		1
72		0
70		0
11		1
48		1
12		1
8		1
48		1
49		1
24		1
43		1
23		0
47		1
68		1
22		1
62		1
24		1
28		0
28		0
31		0
46		0
57		0
72		0
24		0
47		0
28		1
59		1
65		0
45		0
53		1
72		0
42		0
72		0
