# Supplementary material for: Clinical impact of heterogeneously distributed tumor-infiltrating lymphocytes on the prognosis of colorectal cancer
Source: PeerJ journal article supplement (doi:10.7717/peerj.16747), 2024-01-09
Supplement: Patients_data.zip [file The density of TILs.xlsx]

## Sheet: Sheet1
Tumor center			Invasive margin			Tumor stroma
CD3+ TILs	CD8 TILs	CD3+/CD8+	CD3+ TILs	CD8 TILs	CD3+/CD8+	CD3+ TILs	CD8 TILs	CD3+/CD8+
54.32	29.34	1.8514	957.86	403.466	2.37408	358.646	103.78	3.45583
130.57	48.82	2.67452	1076.2	327.291	3.28821	220.54	89.53	2.46331
86.78	39.03	2.22342	947.62	363.71	2.60543	243.215	89.77	2.70932
108.08	84.07	1.2856	1002.54	352.255	2.84608	273.903	185.23	1.47872
103.53	63.94	1.61917	992.04	349.753	2.8364	260.34	109.04	2.38756
78.73	20.95	3.758	991.927	349.64	2.83699	257.718	75.93	3.39416
103.2	48.43	2.13091	1014.15	357.166	2.83944	290.43	81.7	3.55483
75.52	39.65	1.90467	1173.62	347.173	3.38051	405.982	89.36	4.54322
82.34	49.72	1.65607	1161.18	346.148	3.35457	402.18	158.365	2.53958
104.02	37.0397	2.80834	970.47	348.707	2.78306	253.987	185.491	1.36927
87.4025	38.6126	2.26357	1074.05	327.131	3.28324	210.74	167.837	1.25562
79.1114	47.4496	1.66727	1200.29	416.056	2.88493	481.746	97.4837	4.94181
67.5344	38.699	1.74512	1155.36	346.012	3.33907	398.861	85.6626	4.65619
80.5121	53.638	1.50103	1090.27	396.948	2.74664	353.86	189.62	1.86615
114.04	40.71	2.80128	959.78	333.374	2.87899	358.73	169.72	2.11366
70.7	20.1875	3.50217	893.76	312.733	2.8579	168.251	128.044	1.314
20.8242	18.5612	1.12192	911.088	316.448	2.87911	183.65	113.746	1.61456
96.5094	52.986	1.82141	1083.42	396.4	2.73315	353.067	199.994	1.76539
53.7095	49.23	1.09099	1102.83	397.559	2.77401	357.04	173.2	2.06143
61.27	44.4705	1.37777	1096.52	397.4	2.75925	355.6	157.684	2.25515
59.3025	42.56	1.39339	1204.62	435.534	2.76585	539.459	139.06	3.87933
82.94	59.71	1.38905	1108.53	367.205	3.01883	364.02	150.62	2.41681
58.9034	30.74	1.91618	1055.2	385.39	2.738	314.66	182.4	1.72511
103.7	77.1274	1.34453	1056.33	387.06	2.72911	320.052	160.537	1.99363
89.04	67.02	1.32856	1082.43	394.914	2.74093	223.281	185.06	1.20653
102.87	88.2941	1.16508	1037.79	383.85	2.70363	306.306	140.781	2.17576
95.3192	48.9853	1.94587	960.476	335.192	2.86545	360.728	136.787	2.63716
102.883	88.0486	1.16848	1103.43	364.229	3.02948	249.009	203.17	1.22562
77.8347	45.9132	1.69526	938.804	381.67	2.45973	230.52	97.6657	2.3603
193.238	109.989	1.75688	1042.82	384.08	2.71511	307.702	149.954	2.05197
128.077	106	1.20827	947.37	362.968	2.61006	238.615	194.85	1.22461
171.668	93.51	1.83582	1183.61	404.545	2.92577	406.496	189.3	2.14736
95.9373	74.05	1.29557	1019.1	359.851	2.83199	294.71	149.63	1.96959
170.621	131.772	1.29482	1194.38	410.8	2.90745	445.237	205.858	2.16284
136.82	107.82	1.26897	921.414	323.615	2.84725	197.269	160.7	1.22756
137.397	98.05	1.40129	1214.5	920.382	1.31956	623.7	205.476	3.0354
133.998	107.914	1.24171	1011.87	356.119	2.84138	288.699	198.743	1.45262
138.453	123.447	1.12156	936.623	378.317	2.47576	228.32	124.244	1.83767
172.598	87.8451	1.9648	1147.97	344.226	3.33493	390.189	208.953	1.86735
65.0152	47.2456	1.37611	1105.31	367.134	3.01065	251.431	197.981	1.26998
124.337	101.184	1.22881	1124.06	373.364	3.01062	376.375	157.313	2.39253
170.381	103.57	1.64508	1072.78	373.811	2.86985	346.395	185.06	1.8718
138.731	101.241	1.37031	1149.95	345.2	3.33127	391.543	160.047	2.44643
139.923	83.1451	1.68287	943.077	382.437	2.46597	231.39	149.006	1.55289
128.418	74.3383	1.72748	1045.43	384.218	2.72092	312.121	162.154	1.92485
159.958	106.353	1.50402	963.02	339.129	2.83969	252.032	166.08	1.51753
97.6556	42.9758	2.27234	1072.93	376.23	2.85178	348.44	169.65	2.05388
144.07	63.959	2.25254	1123.26	373.137	3.01031	373.18	157.77	2.36534
144.618	72.1284	2.00501	1118.87	369.106	3.03131	370.582	201.099	1.84279
104.83	67.42	1.55488	976.344	348.941	2.79802	255.221	159.025	1.60491
93.4999	61.4127	1.52249	1059.09	388.552	2.72574	325.106	161.206	2.01672
182.524	101.213	1.80337	1276.29	1052.38	1.21277	787.225	208.984	3.76692
108.447	73.9822	1.46585	931.337	377.258	2.4687	351.04	192.51	1.82349
95.9415	63.0091	1.52266	1003.59	352.617	2.84612	279.04	140.75	1.98253
86.3393	40.6993	2.12139	1138.68	339.886	3.35018	385.28	207.258	1.85894
148.773	85.9395	1.73113	1030.41	361.852	2.8476	303.76	146.522	2.07313
278.623	62.2626	4.47496	1017.01	357.478	2.84494	294.706	166.11	1.77417
116.831	84.047	1.39007	1195.18	412.628	2.8965	456.03	201.024	2.26853
168.962	88.8414	1.90184	1209.57	450.03	2.68774	603.368	161.885	3.72713
158.91	76.3484	2.08138	1068.37	373.4	2.8612	336.128	150.88	2.22778
125.71	81.1067	1.54993	1003.65	353.668	2.83782	280.57	237.152	1.18308
129.46	94.4476	1.37071	1070.2	373.49	2.8654	344.105	189.722	1.81374
290.393	108.013	2.6885	1115.94	368.037	3.03213	367.908	181.756	2.02418
106.77	65.2564	1.63616	1196.99	413.491	2.89485	468.314	185.089	2.5302
86.439	37.2495	2.32054	1025.37	361.697	2.83489	303.55	197.172	1.53952
104.73	83.1942	1.25886	1059.94	388.7	2.72688	330.56	171.659	1.92568
187.121	70.5651	2.65175	951.809	398.289	2.38974	357.898	177.02	2.0218
167.572	83.5075	2.00667	998.713	351.552	2.84087	270.933	167.858	1.61406
104.55	52.01	2.01019	1186.56	406.478	2.91913	415.633	203.42	2.04323
129.527	76.619	1.69053	946.78	383.484	2.46889	233.282	173.509	1.34449
136.176	54.06	2.51898	1183.84	406.411	2.9129	412.588	195.77	2.10751
170.05	85.51	1.98866	996.944	350.38	2.84532	270.624	201.216	1.34494
92.8395	42.8327	2.16749	1068.09	389.605	2.74147	330.647	224.372	1.47366
140.935	84.8976	1.66005	1146.05	340.65	3.3643	385.619	165.15	2.33496
283.04	102.46	2.76244	1057.82	387.501	2.72985	322.407	200.768	1.60587
168.905	55.1614	3.06201	1005.71	356.096	2.82426	281.634	224.706	1.25334
110.34	65.03	1.69676	1023.21	361.635	2.8294	302.47	173.88	1.73953
168.93	89.0243	1.89757	1193.82	409.938	2.9122	431.992	194.218	2.22426
